# miR-26a induced the suppression of tumor growth of cholangiocarcinoma via KRT19 approach

Ping Wang<sup>2</sup>, Long Lv<sup>1</sup>

<sup>1</sup>Department of General Surgery, People's Hospital of Gaochun, Gaochun, Nanjing, 211300, Jiangsu Province, China

<sup>2</sup>Department of Endocrinology, People's Hospital of Gaochun, Gaochun, Nanjing, 211300, Jiangsu Province, China

**Correspondence to:** Long Lv, **email:** l3851596501@26a3.com

**Keywords:** proliferation, cholangiocarcinoma, stem cell, miRNA, KRT19

**Received:** July 18, 2016

**Accepted:** October 13, 2016

**Published:** November 09, 2016

## ABSTRACT

**Background and Aims:** KRT19 was identified as one of the key biomarkers for distinguishing cholangiocarcinoma (CCA) and hepatocellular carcinoma. The detailed role of miRNAs involved in the oncogenic incident of KRT19 was poor investigated.

**Results:** Based on prediction and validation, miR-26a was inversely correlated with KRT19 in patients' tissues samples and biopsies. Ectopic expression of miR-26a dramatically suppressed cell proliferation and tumor growth *in vitro* and *in vivo*. Knock-down miR-26a could induce an increasing population of SP cells by promoting KRT19 expression. The KRT19 was also suppressed via directly binding at 3'UTR region by miR-26a.

**Materials and Methods:** Bioinformatics prediction was first applied to screening the potential miRNA involved. RT-PCR, Immunohistochemistry and Western blot were used to examine the expression of miRNAs and candidate genes in 65 pairs of cholangiocarcinoma. The loss-and gain-function assay was employed to detect the role of certain miRNA *in vitro* and *vivo*. Side-population (SP) cells were detected and sorted by flow cytometry.

**Conclusions:** Aberrant decreased miR-26a could promote cell proliferation by regulating KRT19 which play important roles in the pathogenesis of CCA.

## INTRODUCTION

Cholangiocarcinoma (CCA), as a biliary tract cancer originating in the epithelium of the biliary tree, was the second most common primary liver malignant tumor after hepatocellular carcinoma (HCC) and was generally divided into three subgroups including intrahepatic cholangiocarcinoma (ICC), hilar cholangiocarcinoma and extrahepatic cholangiocarcinoma (ECC) [1–3]. According to public data, the incidence and mortality of CCA was rising over the past decade especially in China [4, 5]. However, the detailed mechanisms of the pathogenesis of CCA still remain poor.

KRT19 was revealed as marker for cholangiocytes, hepatic progenitor cells (HPCs) and early hepatoblasts. It has been identified that the existence of KRT19 was linked with a poor prognosis for patients diagnosed with CCA [6–8]. Researchers has found that KRT19 was involving in tumor cell proliferation and invasion promotion not only in HCC, but also in CCA in a Caucasian series of

242 consecutive HCC samples in comparison with other biliary/HPC markers, epithelial cell adhesion molecule (EpCAM) and  $\alpha$ -fetoprotein (AFP) revealed [9–11].

MiRNAs were a set of small, noncoding RNAs with 19-25nt that inversely regulated the gene expression by binding to specific target sites in the 3' Untranslated Regions (UTR) of target mRNA [12, 13]. MiRNAs could act as either oncogene or tumor suppressor gene by regulating cell proliferation, migration, apoptosis and differentiation through a post-transcription level regulation [14, 15]. Reportedly, several studies have identified some dysregulated miRNAs in CCA patients [16, 17]. In addition, miRNAs were also participating in the development of CCA such as lymph node metastasis [18]. Serum circulating miRNAs were promising fingerprints for CCA for which the best chance of successful treatment is timely diagnosis and management [19].

In this study, we searched the database including miRbase, Target Scan, PicTar and miRNA Target to found the candidate miRNAs which might associate with

KRT19. The further loss-and gain-function approaches was also applied *in vitro* and *in vivo*.

## RESULTS

### Decreased miR-26a inversely associated with KRT19 in CCA patients

We first detected the expression of KRT19 in human tissue biopsies obtained from CCA patients by immunohistochemistry. As presented in Figure 1A, we found an aberrant distribution of KRT19 in CCA patients. We next predicted the potential miRNAs which might be associated with KRT19 expression and bound with KRT19 in four independent databases. As presented in Table 1, six miRNAs was considered as candidate. Further RT-PCR was conducted in 65 paired RNA samples from CCA patients

to examine the abnormal expression of candidate miRNAs. Among the six candidates, we found that miR-26a was remarkable decreased in the tumors tissues of CCA patients comparing with the corresponding adjacent (Figure 1B); the rest remains no difference between the two groups (data not shown). To further document the correlation between miR-26a and KRT19, we divided the CCA patients into two subgroups (KRT19<sup>high</sup> and KRT19<sup>low</sup>) by using the medium of KRT19 expression in tumor tissues as cutoff. Interestingly, miR-26a was deeply decreased in patients with a higher expression of KRT19 (Figure 1C). The protein level detection also confirmed the inversely correlation in CCA patients in both tumor tissues and corresponding adjacent tumor tissues (Figure 1D). Based on the clinical information analysis, we found that the miR-26a and KRT19 was highly associated with the tumor size of patients, indicating that miR-26a might act an important role in the tumorigenesis of CCA (Table 2).

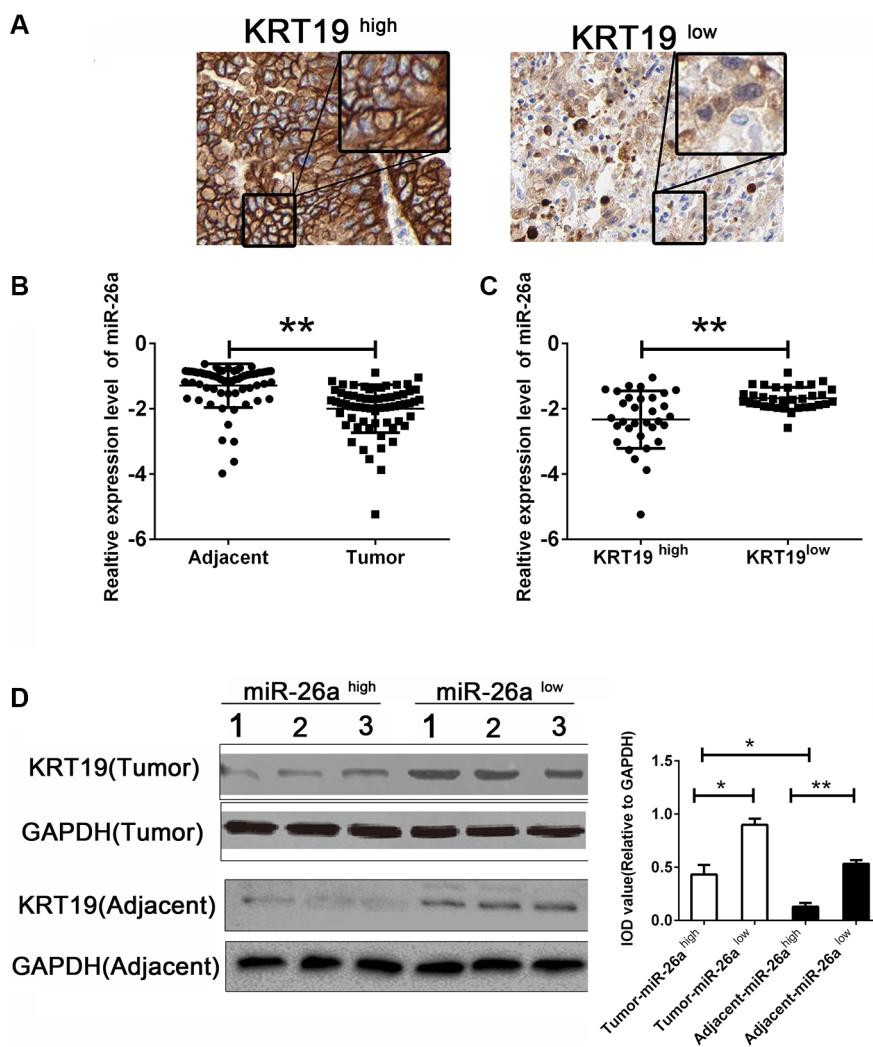

**Figure 1: miR-26a inversely correlation with KRT19.** (A) Representative stain of KRT19 in tumor tissues biopsy of CCA patients. (B) Relative expression levels of miR-26a in human CCA tumor tissues and adjacent corresponding tissues ( $n = 65$ ) were evaluated by qRT-PCR. (C) Relative expression of miR-26a in CCA patients of KRT19<sup>high</sup> and KRT19<sup>low</sup> subgroup. (D) Western blot of KRT19 in CCA patients of miR-26a<sup>high</sup> and miR-26a<sup>low</sup> subgroup. Data were presented as Mean and range of log-transformed relative expression level. \*\*indicates significant difference ( $P < 0.01$ ).

**Table 1: Bioinformatics prediction for potential candidate miRNAs for KRT19**

| Target gene  | Related Gene | miRbase | Target Scan | PicTar | miRNA Target |
|--------------|--------------|---------|-------------|--------|--------------|
| <b>KRT19</b> | miR-26a      | √       | √           | √      | √            |
|              | miR-298      | √       | √           |        | √            |
|              | miR-922      |         | √           | √      | √            |
|              | miR-1912     |         | √           | √      | √            |
|              | miR-4482     | √       | √           | √      |              |
|              | miR-8080     | √       | √           | √      |              |

**Table 2: The clinicopathological relevance analysis of miR-26a and KRT19 expression in cholangiocarcinoma patients**

| Characteristic               | miR-26a |      | P value | KRT19 |      | P value |
|------------------------------|---------|------|---------|-------|------|---------|
|                              | Low     | High |         | Low   | High |         |
| <b>All cases</b>             | 33      | 32   |         | 32    | 33   |         |
| <b>Age</b>                   |         |      | 0.714   |       |      | 0.714   |
| < 60                         | 15      | 16   |         | 16    | 15   |         |
| ≥ 60                         | 18      | 16   |         | 16    | 18   |         |
| <b>Gender</b>                |         |      | 0.725   |       |      | 0.228   |
| Male                         | 22      | 20   |         | 23    | 19   |         |
| Female                       | 11      | 12   |         | 9     | 14   |         |
| <b>Differentiation grade</b> |         |      | 0.897   |       |      | 0.367   |
| Well                         | 21      | 22   |         | 23    | 20   |         |
| Moderate                     | 8       | 7    |         | 5     | 10   |         |
| Poorly                       | 4       | 3    |         | 4     | 3    |         |
| <b>Tumor Size (cm)</b>       |         |      | 0.035   |       |      | 0.002   |
| ≤ 5 cm                       | 12      | 20   |         | 22    | 10   |         |
| > 5 cm                       | 21      | 12   |         | 10    | 23   |         |
| <b>Tumor Origination</b>     |         |      | 0.915   |       |      | 0.995   |
| Left                         | 13      | 11   |         | 12    | 12   |         |
| Right                        | 19      | 20   |         | 19    | 20   |         |
| Bilateral                    | 1       | 1    |         | 1     | 1    |         |
| <b>TNM stage</b>             |         |      | 0.694   |       |      | 0.371   |
| I-II                         | 18      | 19   |         | 20    | 17   |         |
| III                          | 15      | 13   |         | 12    | 16   |         |
| <b>Metastasis</b>            |         |      | 0.909   |       |      | 0.379   |
| Yes                          | 18      | 17   |         | 19    | 16   |         |
| No                           | 15      | 15   |         | 13    | 17   |         |

**Function assay of miR-26a *in vitro* and *in vivo***

According to the data collected above, we then examined the function of miR-26a in both RBE and HCCC-9810 cell lines. The expression of miR-26a as well as KRT19 was confirmed firstly (Supplementary Figure S1). The CCK8 assay revealed that the absorption in 450 nm of cells was statistically suppressed by treating cells with miR-26a mimics while could be attenuated by

treating cells with miR-26a inhibitor when monitored the proliferation for five days (Figure 2A). In addition, the proliferative cells were also measured by EDU assay treating with different groups after 48 hours. As presented in Figure 2B, we found that when normalized with DAPI, the percentage of cells in the logarithmic phase was reduced when ectopic expressing miR-26a in both RBE and HCCC-9810. The proliferative cells could also be elevated by suppression the expression of miR-26a

(Figure 2B). Since miR-26a has been mentioned associating with cell invasion in human cancers [20], we also measured cell invasion by using transwell assay. As presented in Supplementary Figure S2, no significant difference was obtained among each group.

The *in vivo* tumor growth activity assay on CCA was further examined in the xenograft model in nude mice. Among the cell lines tested, both the subcutaneous inoculation of RBE and HCCC-9810 cells into nude mice caused the tumor burden at the site of injection in all mice. The sizes of tumors formed in mice treated with miR-26a

mimics were significantly smaller than those of the control. Consistently, cells treated with miR-26a inhibitor caused a promoted tumor growth comparing with the inhibitor control group (Figure 3A, 3B).

### MiR-26a targeting side population cells in CCA

Previous studies have indicated that KRT19 contributed toward the maintenance of cancer stem cells (CSCs) [21]. The side population (SP) cells are a rare subset of cells enriched with CSCs and has also been

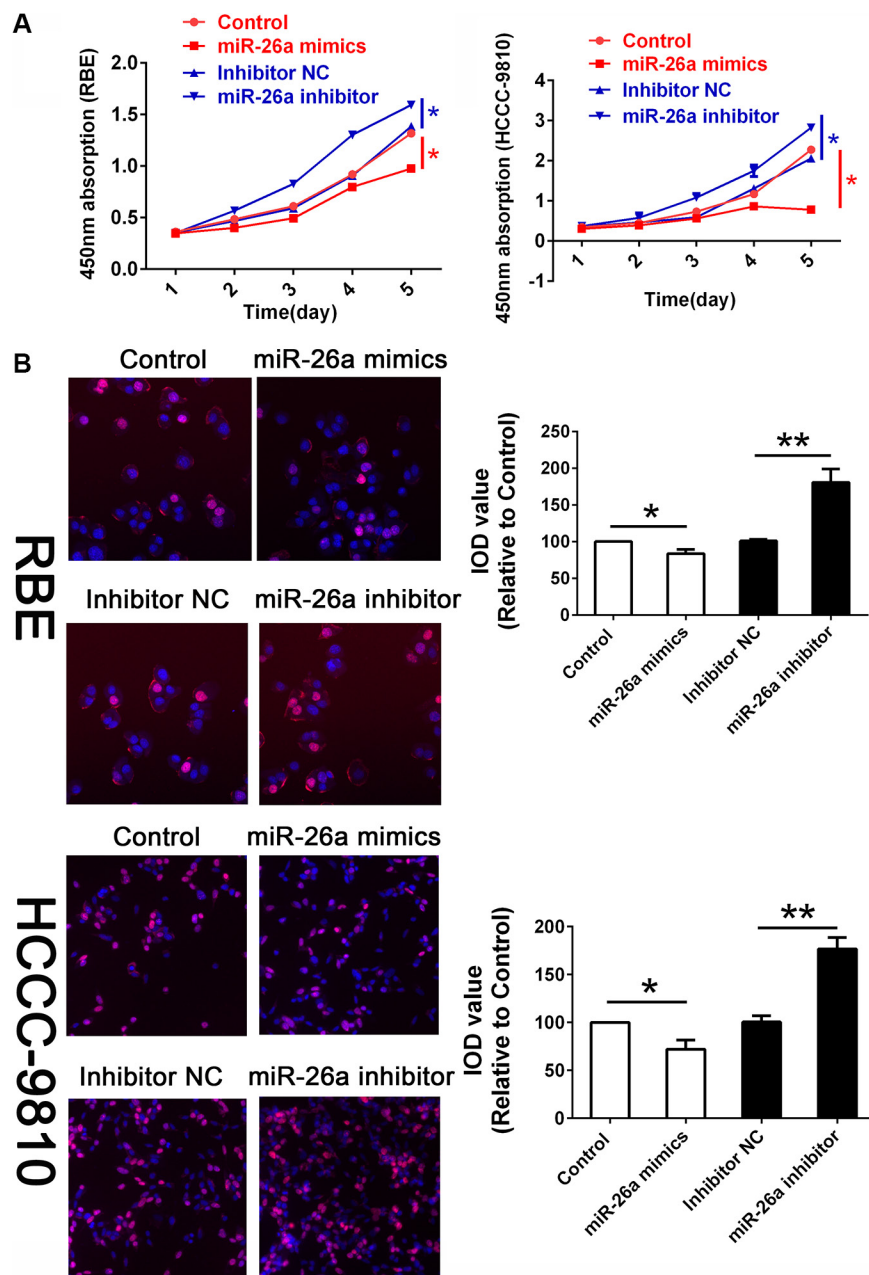

**Figure 2: miR-26a suppressed cell proliferation *in vitro*.** (A) CCK8 assay were employed to detecting the proliferation of CCA cells. Data was presented with Mean  $\pm$  SE. \*indicates significant difference compared with that of control cells ( $P < 0.05$ ). (B) The EDU stain also performed in cells treated as described above with a magnification of 200. The integral optical density value of cells treated with control plasmids was normalized to 100%.

used to exploring the stem-like function of KRT19 [22]. The SP phenotype has been proven to be invaluable for stem cell isolation in the absence of definitive cell surface markers [23, 24]. We considered that if miR-26a was associated with KRT19, the SP distribution might be also altered by the dysregulation of miR-26a. We next examined the proportion of SP cells in RBE cells with different treating. ABC transporter activity was inhibited using verapamil hydrochloride as the control group. In samples without any treating, about 5.7% of SP cells were stained positively. In the cells treating with miR-26a inhibitor, more than 10% of SP cells were detected (Figure 4A). We also tried to detect the SP population in cells overexpressed with miR-26a; however, the percentage of SP cells was difficult to distinguish from the verapamil normalization as well as further sorting.

Next, we sorted the SP cells and conducted the ICC assay targeting KRT19 to further confirm the different distribution of SP. We found that alone with the decreased number of SP cells, the KRT19 was also increased in those cells (Figure 4B).

### KRT19 was the direct targets of miR-26a

Since miR-26a could suppress the cell proliferation and SP population in CCA cell lines, the detailed

mechanism still remains unclear. Based on the regulation pattern of miRNAs in human carcinoma reported, we detected the mRNA and protein expression of KRT19 in the two cell lines treating with miR-26a mimics or inhibitor. As present in Figure 4C, the mRNA expression of KRT19 was decreased in cells treating with miR-26a mimics and could be upregulated by inhibiting miR-26a expression. The regulation was also confirmed by western blot (Figure 5A, 5B).

Furthermore, The miRNA luciferase reporter assay by constructing the wild type and mutant type luciferase reporter plasmids containing the binding region of the 3'UTR of KRT19 mRNA were employed (Figure 5C). We found that co-transfection of miR-26a mimics and pGL3-KRT19 3'UTR wild type reporter plasmids significantly reduced the luciferase activity in cell lines, as compared with the control and the mutant type, suggesting miR-26a directly targets KRT19 (Figure 5D).

## DISCUSSION

To our knowledge, It was the first time for us reporting the function role of miR-26a in cholangiocarcinoma through regulation of KRT19 approach. We have identified miR-26a as an important tumor suppressor of cholangiocarcinoma growth both *in vitro* and *in vivo*. We also found that

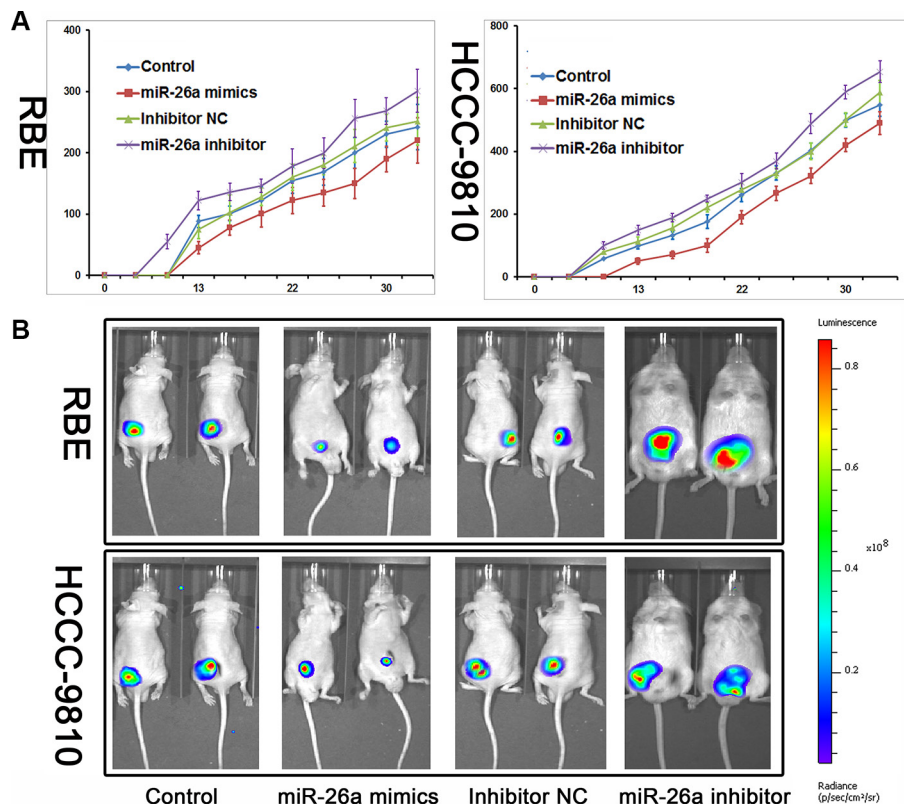

**Figure 3: miR-26a decreased tumor growth *in vivo*.** (A) Nude mice were subcutaneously transplanted with cells stably expressed with miR-26a mimics/Inhibitor or control ( $n = 5$ ). The volume of each tumor was calculated as the length  $\times$  width<sup>2</sup>  $\times$  0.5. The unit of y-coordinate was mm<sup>3</sup>. (B) Mice with established tumors in different groups were imaged every 7 days with the IVIS Lumina II system; the images shown were taken on day 25.

treating with miR-26a might suppress CCA tumor growth in xenografts, suggesting a therapeutic potential for CCA patients in the future. Most importantly, we provided evidence that the miR-26a might suppress the tumor growth via decreasing the side population cell percentage resulting in the inhibition of stem-like cells in CCA.

Numerous studies suggested that miRNAs played an important role in the pathogenesis of tumor. It was reported that the dysregulation of miRNAs participated in CCA progression acting as either suppressors or promoters at the post-transcriptional regulation stage. For example,

lower expression of miR-122 in CCA tissues, and higher expression of miR-122 could inhibit proliferation, stimulate apoptosis and suppress invasion of tumor cells, indicating that miRNA might be a new target for CCA diagnosis or treatment [25]. In addition, miR-21, as an oncogene, promoted cell proliferation and growth *in vivo* and *in vitro* by directly targeting PTPN14 and PTEN mRNAs in CCA [26, 27].

Among the various miRNAs identified in human malignant tumors, miR-26a was confirmed as an important role in the development of cancer. Lu, et al. found that

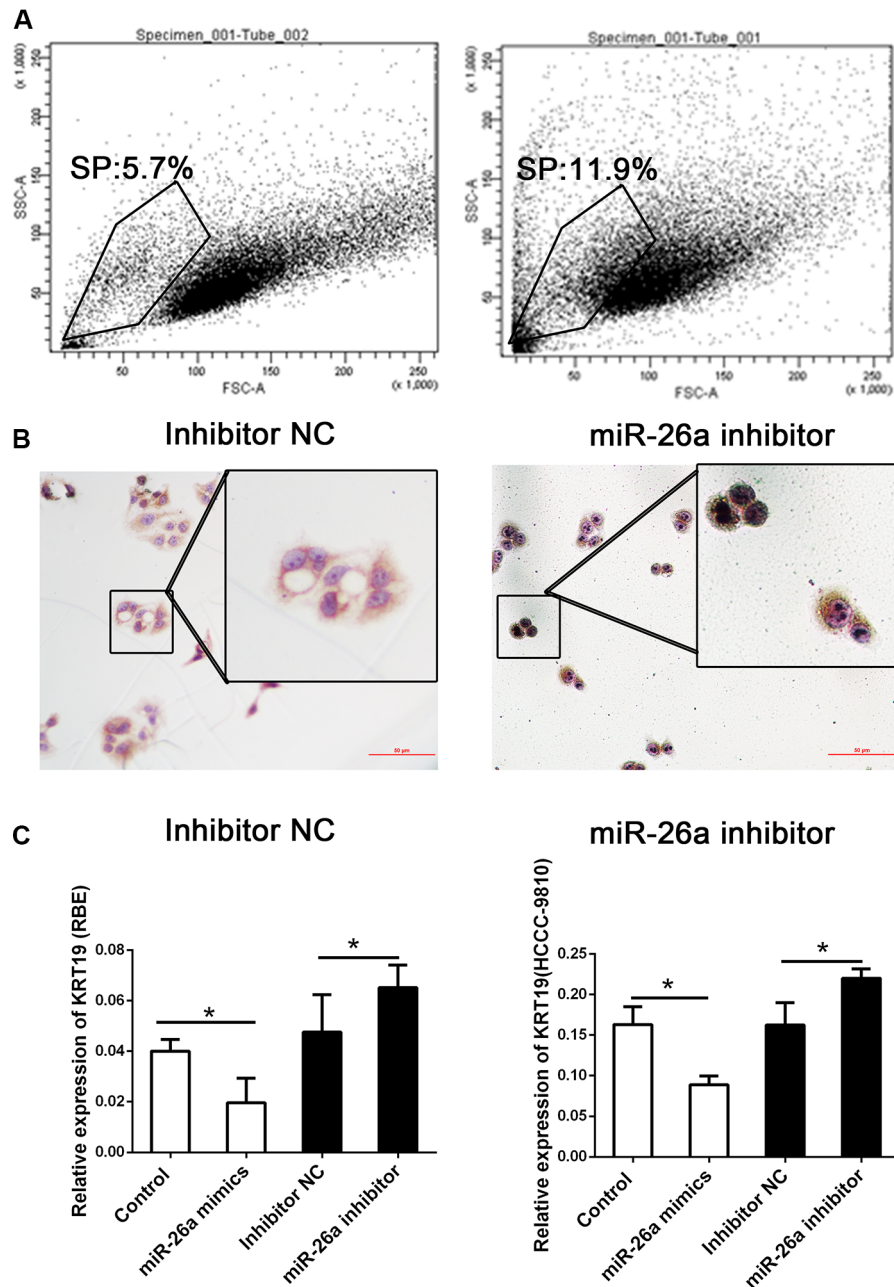

**Figure 4: Decreased miR-26a could promote the distribution of side-population cells.** (A) The percentage in the SP cells detected by flow cytometry (B) Immunocytochemistry on cytosine of sorted cells targeting KRT19. Scale bar: 200 mm; magnification scale bars 100 mm. (C) Relative expression of KRT19 in cells treated with miR-26a mimics, inhibitor or controls. \*indicates significant difference compared with that of control cells ( $P < 0.05$ ). All tests were performed in triplicate and presented as mean  $\pm$  SE.



## CONCLUSIONS

The aberrant expression level of miR-26a in CCA patients was high associated with tumor growth. Based on our founding, miR-26a may associate with the proliferation of CCA cells by down-regulated KRT19. The important role of miR-26a might provide a theoretical basis of a novel targeted therapy for CCA.

## MATERIALS AND METHODS

### Patient and tissue samples

65 paired CCA tissues were obtained after routine surgery. Immediately snap frozen in liquid nitrogen, and stored at  $-80^{\circ}\text{C}$  until RNA and protein extraction. Informed consent for tissue analysis was obtained prior to surgery; the study was approved by our Institutional Ethics Committee. All the tissues used in this study was confirmed as CCA through pathological diagnosis. The tumors were classified according to World Health Organization classification. This study was approved by the Ethical Committee of The People's Hospital of Gaochun and every patient had written informed consent.

### Cell culture and transfection

CCA cell lines including RBE and HCCC-9810 were purchased from the Chinese Academy of Sciences Cell Bank (Shanghai, China). All cells were cultured in RPMI-1640 (Gibco, USA) supplemented with 10% fetal bovine serum (FBS) (Invitrogen, Carlsbad, USA) and grown in humidified 5%  $\text{CO}_2$  at  $37^{\circ}\text{C}$ . MiR-26a mimics, inhibitor and relative controls were obtained from Genepharma (Shanghai, China). The transfection was conducted by using Lipofectamine 2000 (Invitrogen Corp, CA, USA) as described previously [32].

### Bioinformatics analysis

The bioinformatics analysis was employed by using the miRNA associated target genes prediction database. We searched the potential miRNAs which might target KRT19 in Targetscan ([www.targetscan.org/](http://www.targetscan.org/)), PicTar ([pictar.mdc-berlin.de/](http://pictar.mdc-berlin.de/)) and miRTarget ([mirdb.org/](http://mirdb.org/)) [33]. The mature sequence of KRT19 3'UTR was used as the template. The candidate target genes were screened according to the rank score of database.

### Quantitative RT-PCR

RNA purity and concentration were detected by UV spectroscopy while RNA integrity was evaluated using agarose gel electrophoresis. The cDNA template was got by reverse transcription (RT) step using NCodeTM miRNA First-Strand complementary DNA synthesis kit,

and then Fast SYBR Green Master Mix was used for real-time PCR with ABI 7900 real-time PCR system (ABI, CA, USA) according to the protocol reported [18]. Real-time PCR protocol included an initial denaturation step ( $95^{\circ}\text{C}$  for 5 min) and 40 cycles of denaturation ( $95^{\circ}\text{C}$  for 10s), annealing ( $60^{\circ}\text{C}$  for 20s) and extension ( $72^{\circ}\text{C}$  for 10s). The relative expression level of miR-26a was calculated using  $2^{-\Delta\Delta\text{Ct}}$  method.

### Protein analysis

Total proteins extracted from tissues or cultured cells using RIPA buffer containing PMSF were used for western blot (Roche, Basel, Switzerland). Equal amount of proteins (100 ug) were separated with 7.5%/12.5% sodium dodecyl sulphate polyacrylamide gel electrophoresis (SDS-PAGE) and transferred to polyvinylidene fluoride (PVDF) membrane. The blots were developed using ECL reagent (Millipore, MASS, USA). Equal amount of protein loading in each lane was confirmed and normalized using GAPDH antibody.

### Cell proliferation assays

CCK8 assay was applied to detect cell proliferation. Absorbance at 450 nm was measured by the TECAN infinite M200 Multimode microplate reader (Tecan, Mechelen, Belgium). EDU (5-ethynyl-2'-deoxyuridine) assay was used. The red stain indicted the proliferative cells. Each assay was performed in triplicate and repeated three times independently.

### Dual-luciferase reporter assay

The 3'-UTR sequence of KRT19 predicted to interact with miR-26a or a mutated sequence with the predicted target sites were inserted into pGL3 promoter vector (Genscript, Nanjing, China). A Renilla luciferase vector pRL-SV40 (5 ng) was also co-transfected to normalize the differences in transfection efficiency. Transfection was repeated three times in triplicate.

### Xenograft model in nude mice

Xenograft tumors were generated by subcutaneous injection of RBE and HCCC-9810 cells ( $2 \times 10^6$ ), stably treating with miR-26a mimics or inhibitor, into the hind limbs of 4–6 week old BALB/C athymic nude mice (nu/nu;  $n = 5$  for each group). All mice were housed and maintained under specific pathogen-free conditions. All experiments were approved by the Animal Care and Use Committee and performed in accordance with institutional guidelines. Tumor size was measured using a slide caliper and tumor volume was determined by the formula:  $0.5 \times A \times B^2$  and was monitored by the IVIS@ Lumina II system (A: length, B: width).



## Side-population cell detection and sorting

Cells were incubated with the transport blockers verapamil (100  $\mu$ M; Sigma-Aldrich, MO, USA) 20 minutes prior to the Hoechst33342 incubation. After that, the Propidium Iodide (2  $\mu$ g/ml; Sigma-Aldrich, MO, USA) as markers for viable cells was added. The cell suspensions were analyzed using a FACSAriaII (BD Biosciences, CA, USA). The SP was visualized after UV excitation on the basis of blue emission through a 424/44 filter and of red emission through a 630/22 filter (Omega Optical, Brattleboro, VT). Within the living cell population (propidium iodide negative), the side and main population (MP) were sorted separately and collected.

## Statistical analysis

All the experiments were repeated for three times independently. Numerical data were presented as Means  $\pm$  standard deviation (SD). Experimental data of tissue samples were presented as box plot of the median and range of log-transformed which was analyzed by Wilcoxon rank-sum (Mann-Whitney) test. While the results obtained from experiment *in vitro* assays were analyzed by double-sided Student's *t*-test. Results were considered statistically significant at  $P < 0.05$ .

## Abbreviations

CCA: cholangiocarcinoma; UTR: untranslated region; RT-PCR: real time: polymerase chain reaction; SDS-PAGE: sodium dodecyl sulphate polyacrylamide gel electrophoresis; PVDF: polyvinylidene fluoride; EDU:5-ethynyl-2'-deoxyuridine; SP: side population.

## CONFLICTS OF INTEREST

The authors declare that they have no financial conflicts of interest.

## REFERENCES

- Hrad V, Abebe Y, Ali SH, Velgersdyk J, Al Hallak M, Imam M. Risk and Surveillance of Cancers in Primary Biliary Tract Disease. *Gastroenterology research and practice*. 2016; 2016:3432640.
- Loffler MW, Anoop Chandran P, Laske K, Schroeder C, Bonzheim I, Walzer M, Hilke FJ, Trautwein N, Kowalewski DJ, Schuster H, Gunder M, Carcamo Yanez VA, Mohr C, et al. Personalized peptide vaccine induced immune response associated with long-term survival of a metastatic cholangiocarcinoma patient. *Journal of hepatology*. 2016.
- Cheng W, Tian L, Wang B, Qi Y, Huang W, Li H, Chen YJ. Downregulation of HP1 $\alpha$  suppresses proliferation of cholangiocarcinoma by restoring SFRP1 expression. *Oncotarget*. 2016; 7:48107–48119. doi: 10.18632/oncotarget.10371.
- Yang Y, Liu Y, He JC, Wang JM, Schemmer P, Ma CQ, Qian YW, Yao W, Zhang J, Qi WP, Fu Y, Feng W, Yang T. 14-3-3zeta and aPKC-iota synergistically facilitate epithelial-mesenchymal transition of cholangiocarcinoma via GSK-3 $\beta$ /snail signaling pathway. *Oncotarget*. 2016; 7:55191–55210. doi: 10.18632/oncotarget.10483.
- Wang Y, Cui W, Fan W, Zhang Y, Yao W, Huang K, Li J. Percutaneous intraductal radiofrequency ablation in the management of unresectable Bismuth types III and IV hilar cholangiocarcinoma. *Oncotarget*. 2016; 7:53911–53920. doi: 10.18632/oncotarget.10116.
- Akiba J, Nakashima O, Hattori S, Naito Y, Kusano H, Kondo R, Nakayama M, Tanikawa K, Todoroki K, Umeno Y, Nakamura K, Sanada S, Yamaguchi R, et al. The expression of arginase-1, keratin (K) 8 and K18 in combined hepatocellular-cholangiocarcinoma, subtypes with stem-cell features, intermediate-cell type. *Journal of clinical pathology*. 2016.
- Komuta M, Spee B, Vander Borgh S, De Vos R, Verslype C, Aerts R, Yano H, Suzuki T, Matsuda M, Fujii H, Desmet VJ, Kojiro M, Roskams T. Clinicopathological study on cholangiolocellular carcinoma suggesting hepatic progenitor cell origin. *Hepatology*. 2008; 47:1544–1556.
- Cogliati B, Aloia TP, Bosch RV, Alves VA, Hernandez-Blazquez FJ, Dagli ML. Identification of hepatic stem/progenitor cells in canine hepatocellular and cholangiocellular carcinoma. *Veterinary and comparative oncology*. 2010; 8:112–121.
- Kawai T, Yasuchika K, Ishii T, Katayama H, Yoshitoshi EY, Ogiso S, Kita S, Yasuda K, Fukumitsu K, Mizumoto M, Hatano E, Uemoto S. Keratin 19, a Cancer Stem Cell Marker in Human Hepatocellular Carcinoma. *Clinical cancer research*. 2015; 21:3081–3091.
- Fatourou E, Koskinas J, Karandrea D, Palaiologou M, Syminelaki T, Karanikolas M, Felekouras E, Antoniou E, Manesis EK, Delladetsima J, Tiniakos D. Keratin 19 protein expression is an independent predictor of survival in human hepatocellular carcinoma. *European journal of gastroenterology & hepatology*. 2015; 27:1094–1102.
- Govaere O, Komuta M, Berkens J, Spee B, Janssen C, de Luca F, Katoonizadeh A, Wouters J, van Kempen LC, Durnez A, Verslype C, De Kock J, Rogiers V, et al. Keratin 19: a key role player in the invasion of human hepatocellular carcinomas. *Gut*. 2014; 63:674–685.
- Zhang WC, Chin TM, Yang H, Nga ME, Lunny DP, Lim EK, Sun LL, Pang YH, Leow YN, Malusay SR, Lim PX, Lee JZ, Tan BJ, et al. Tumour-initiating cell-specific miR-1246 and miR-1290 expression converge to promote non-small cell lung cancer progression. *Nature communications*. 2016; 7:11702.
- Smallwood DT, Apollonio B, Willmott S, Lezina L, Alharthi A, Ambrose AR, De Rossi G, Ramsay AG,

- Wagner SD. Extracellular vesicles released by CD40/IL-4 stimulated chronic lymphocytic leukemia cells confer altered functional properties to CD4+ T cells. *Blood*. 2016.
14. Wesseling H, Xu B, Want EJ, Holmes E, Guest PC, Karayiorgou M, Gogos JA, Bahn S. System-based proteomic and metabolomic analysis of the Df(16)A+/- mouse identifies potential miR-185 targets and molecular pathway alterations. *Molecular psychiatry*. 2016.
  15. Kosaka N, Yoshioka Y, Fujita Y, Ochiya T. Versatile roles of extracellular vesicles in cancer. *The Journal of clinical investigation*. 2016; 126:1163–1172.
  16. Murakami Y, Yasuda T, Saigo K, Urashima T, Toyoda H, Okanoue T, Shimotohno K. Comprehensive analysis of microRNA expression patterns in hepatocellular carcinoma and non-tumorous tissues. *Oncogene*. 2006; 25:2537–2545.
  17. Meng F, Henson R, Lang M, Wehbe H, Maheshwari S, Mendell JT, Jiang J, Schmittgen TD, Patel T. Involvement of human micro-RNA in growth and response to chemotherapy in human cholangiocarcinoma cell lines. *Gastroenterology*. 2006; 130:2113–2129.
  18. Tucci P, Agostini M, Grespi F, Markert EK, Terrinoni A, Vousden KH, Muller PA, Dotsch V, Kehrlöesser S, Sayan BS, Giaccone G, Lowe SW, Takahashi N, et al. Loss of p63 and its microRNA-205 target results in enhanced cell migration and metastasis in prostate cancer. *Proceedings of the National Academy of Sciences of the United States of America*. 2012; 109:15312–15317.
  19. Wang LJ, Zhang KL, Zhang N, Ma XW, Yan SW, Cao DH, Shi SJ. Serum miR-26a as a diagnostic and prognostic biomarker in cholangiocarcinoma. *Oncotarget*. 2015; 6:18631–18640. doi: 10.18632/oncotarget.4072.
  20. Guo K, Zheng S, Xu Y, Xu A, Chen B, Wen Y. Loss of miR-26a-5p promotes proliferation, migration, and invasion in prostate cancer through negatively regulating SERBP1. *Tumour biology*. 2016.
  21. Bioulac-Sage P, Balabaud C. Perinodular CK19 loss in hepatocarcinogenesis. *Clinics and research in hepatology and gastroenterology*. 2011; 35:783–785.
  22. Govaere O, Wouters J, Petz M, Vandewynckel YP, Van den Eynde K, Van den Broeck A, Verhulst S, Dolle L, Gremeaux L, Ceulemans A, Nevens F, van Grunsven LA, Topal B, et al. Laminin-332 sustains chemoresistance and quiescence as part of the human hepatic cancer stem cell niche. *Journal of hepatology*. 2016; 64:609–617.
  23. Miranda-Lorenzo I, Dorado J, Lonardo E, Alcalá S, Serrano AG, Clausell-Tormos J, Cioffi M, Megias D, Zagorac S, Balic A, Hidalgo M, Erkan M, Kleeff J, et al. Intracellular autofluorescence: a biomarker for epithelial cancer stem cells. *Nature methods*. 2014; 11:1161–1169.
  24. Wang Y, Wu P, Lin R, Rong L, Xue Y, Fang Y. LncRNA NALT interaction with NOTCH1 promoted cell proliferation in pediatric T cell acute lymphoblastic leukemia. *Scientific reports*. 2015; 5:13749.
  25. Liu N, Jiang F, He TL, Zhang JK, Zhao J, Wang C, Jiang GX, Cao LP, Kang PC, Zhong XY, Lin TY, Cui YF. The Roles of MicroRNA-122 Overexpression in Inhibiting Proliferation and Invasion and Stimulating Apoptosis of Human Cholangiocarcinoma Cells. *Scientific reports*. 2015; 5:16566.
  26. Wang LJ, He CC, Sui X, Cai MJ, Zhou CY, Ma JL, Wu L, Wang H, Han SX, Zhu Q. MiR-21 promotes intrahepatic cholangiocarcinoma proliferation and growth *in vitro* and *in vivo* by targeting PTPN14 and PTEN. *Oncotarget*. 2015; 6:5932–5946. doi: 10.18632/oncotarget.3465.
  27. Palumbo T, Poultsides GA, Kouraklis G, Liakakos T, Drakaki A, Peros G, Hatzia Apostolou M, Iliopoulos D. A functional microRNA library screen reveals miR-410 as a novel anti-apoptotic regulator of cholangiocarcinoma. *BMC cancer*. 2016; 16:353.
  28. Lu J, Song G, Tang Q, Yin J, Zou C, Zhao Z, Xie X, Xu H, Huang G, Wang J, Lee DF, Khokha R, Yang H, et al. MiR-26a inhibits stem cell-like phenotype and tumor growth of osteosarcoma by targeting Jagged1. *Oncogene*. 2016.
  29. Sun TY, Xie HJ, He H, Li Z, Kong LF. miR-26a inhibits the proliferation of ovarian cancer cells via regulating CDC6 expression. *American journal of translational research*. 2016; 8:1037–1046.
  30. Shao Y, Li P, Zhu ST, Yue JP, Ji XJ, Ma D, Wang L, Wang YJ, Zong Y, Wu YD, Zhang ST. MiR-26a and miR-144 inhibit proliferation and metastasis of esophageal squamous cell cancer by inhibiting cyclooxygenase-2. *Oncotarget*. 2016; 7:15173–15186. doi: 10.18632/oncotarget.7908.
  31. Asfaha S, Hayakawa Y, Muley A, Stokes S, Graham TA, Ericksen RE, Westphalen CB, von Burstin J, Mastracci TL, Worthley DL, Guha C, Quante M, Rustgi AK, et al. Krt19(+)/Lgr5(-) Cells Are Radioresistant Cancer-Initiating Stem Cells in the Colon and Intestine. *Cell stem cell*. 2015; 16:627–638.
  32. Tang J, Zhuo H, Zhang X, Jiang R, Ji J, Deng L, Qian X, Zhang F, Sun B. A novel biomarker Linc00974 interacting with KRT19 promotes proliferation and metastasis in hepatocellular carcinoma. *Cell death & disease*. 2014; 5:e1549.
  33. To KK, Leung WW, Ng SS. A novel miR-203-DNMT3b-ABCG2 regulatory pathway predisposing colorectal cancer development. *Molecular carcinogenesis*. 2016.
